# Supplementary material for: Inside the “African Cattle Complex”: Animal Burials in the Holocene Central Sahara
Source: PLoS One. 2013 Feb 20;8(2):e56879. doi: 10.1371/journal.pone.0056879 (PMC3577651; doi:10.1371/journal.pone.0056879)
Supplement: Table S1 — Main features of the corbeilles , used for GIS analysis. (XLS) [file pone.0056879.s003.xls]

## Sheet: corbeille_14_03_2012
			Position and Topography		Wadi Features			Monument Features				Intersite Feature			Data source
ID structure (1)	Structure Field Code (2)	Wadi name (3)	Topography (4)	Geomorphology (5)	Wadi Hierarchy (6)	Wadi Geoography (7)	Wadi Morphology (8)	Type (9)	Size (10)	Elevation (11)	Stelae (12)	Reciprocal minimum distance (13)	Distance from wadi bank (14)	Accessibility (15)	Archaeological investigation	Reference
117		Abaoha	hamada	desert pavement	main	end	meandering	nd	nd	nd	single	Very remote	Far	Medium	A & A.M.Van Albada courtesy	Unpublished data: A & A.M. Van Albada
11		Adroh	hamada	fluvial scarp	main	middle	meandering	nd	nd	nd	nd	Very remote	Very close	Medium	A & A.M.Van Albada courtesy	Unpublished data: A & A.M. Van Albada
56		Ahetes	wadi (in)	slope	main	middle	meandering	nd	nd	nd	nd	Very remote	Very close	Medium	published data	Published data: Gauthier 2004: 51
8		Alamas	hamada	desert pavement	confluence	middle	meandering	nd	nd	nd	nd	Very remote	Far	Easy	published data	Published data: Gauthier 2004: 51
9		Alamas	wadi (out)	slope	main	middle	meandering	double ring	medium	flat	single	Aggregated	Close	Medium	published data	Published data: Gauthier 2004: 51
10		Alamas	wadi (out)	slope	main	middle	meandering	double ring	medium	flat	single	Aggregated	Close	Medium	published data	Published data: Gauthier 2004: 51
12	11/337 C1	Alamas	hamada	outcrop	main	middle	straight	nd	nd	nd	nd	Very remote	Far	Easy	survey	MCMP
13		Alamas	hamada	desert pavement	confluence	middle	meandering	complex	large	flat	single engraved	Aggregated	Far	Easy	published data	Published data: Gauthier 2004: 51
14		Alamas	hamada	desert pavement	confluence	middle	meandering	complex	large	slightly elevated	multiple engraved	Aggregated	Close	Easy	published data	Published data: Gauthier 2004: 51
19		Alamas	wadi (in)	wadi	main	middle	meandering	nd	nd	nd	single engraved	Remote	Very close	Medium	published data	Published data: Gauthier 2004: 51
22		Alamas	hamada	desert pavement	main	middle	meandering	nd	nd	nd	nd	Remote	Very far	Medium	published data	Published data: Gauthier 2004: 51
171	Ankbritt C1	Ankbritt	hamada	desert pavement	main	middle	meandering	simple	large	slightly elevated	absent	Aggregated	Very close	Medium	survey	The Italian Archaeological Mission in the Sahara archive
172	Ankbritt C11	Ankbritt	hamada	desert pavement	main	middle	meandering	simple	large	slightly elevated	single	Aggregated	Close	Medium	survey	The Italian Archaeological Mission in the Sahara archive
173	Ankbritt C14	Ankbritt	hamada	desert pavement	main	middle	meandering	simple	medium	elevated	single	Aggregated	Very close	Medium	survey	The Italian Archaeological Mission in the Sahara archive
174	Ankbritt C15	Ankbritt	hamada	desert pavement	main	middle	meandering	simple	medium	slightly elevated	absent	Aggregated	Close	Medium	survey	The Italian Archaeological Mission in the Sahara archive
175	Ankbritt C3	Ankbritt	hamada	desert pavement	main	middle	meandering	simple	small	elevated	absent	Aggregated	Close	Medium	survey	The Italian Archaeological Mission in the Sahara archive
176	Ankbritt C17	Ankbritt	hamada	desert pavement	main	middle	meandering	simple	medium	slightly elevated	single	Aggregated	Close	Medium	survey	The Italian Archaeological Mission in the Sahara archive
177	Ankbritt C16	Ankbritt	hamada	desert pavement	main	middle	meandering	simple	medium	slightly elevated	single	Aggregated	Close	Medium	survey	The Italian Archaeological Mission in the Sahara archive
178	Ankbritt C18	Ankbritt	hamada	desert pavement	main	middle	meandering	simple	large	slightly elevated	single	Aggregated	Close	Medium	survey	The Italian Archaeological Mission in the Sahara archive
179	Ankbritt C2	Ankbritt	hamada	desert pavement	main	middle	meandering	simple	medium	slightly elevated	single	Aggregated	Close	Medium	survey	The Italian Archaeological Mission in the Sahara archive
180	Ankbritt C4	Ankbritt	hamada	desert pavement	main	middle	meandering	complex	medium	slightly elevated	single	Aggregated	Close	Medium	survey	The Italian Archaeological Mission in the Sahara archive
181	Ankbritt C5	Ankbritt	hamada	desert pavement	main	middle	meandering	simple	medium	slightly elevated	single	Aggregated	Close	Medium	survey	The Italian Archaeological Mission in the Sahara archive
182	Ankbritt C6	Ankbritt	hamada	desert pavement	main	middle	meandering	complex	medium	flat	multiple	Aggregated	Close	Medium	survey	The Italian Archaeological Mission in the Sahara archive
183	Ankbritt C7	Ankbritt	hamada	desert pavement	main	middle	meandering	simple	small	flat	single	Aggregated	Close	Medium	survey	The Italian Archaeological Mission in the Sahara archive
184	Ankbritt C8	Ankbritt	hamada	desert pavement	main	middle	meandering	simple	large	slightly elevated	single	Aggregated	Close	Medium	survey	The Italian Archaeological Mission in the Sahara archive
185	Ankbritt C9	Ankbritt	hamada	desert pavement	main	middle	meandering	simple	medium	slightly elevated	single	Aggregated	Very close	Medium	survey	The Italian Archaeological Mission in the Sahara archive
186	Ankbritt C10	Ankbritt	hamada	desert pavement	main	middle	meandering	simple	medium	slightly elevated	single	Aggregated	Very close	Medium	survey	The Italian Archaeological Mission in the Sahara archive
187	Ankbritt C12	Ankbritt	hamada	desert pavement	main	middle	meandering	simple	medium	slightly elevated	single	Aggregated	Very close	Medium	survey	The Italian Archaeological Mission in the Sahara archive
188	Ankbritt C13	Ankbritt	hamada	desert pavement	main	middle	meandering	simple	medium	slightly elevated	single	Aggregated	Very close	Medium	survey	The Italian Archaeological Mission in the Sahara archive
189		Ankbritt	hamada	desert pavement	main	middle	meandering	simple	small	slightly elevated	single	Isolated	Very close	Medium	A & A.M.Van Albada courtesy	Unpublished data: A & A.M. Van Albada
169		Aramas Ikufar	hamada	slope	main	end	meandering	nd	nd	nd	nd	Very remote	Very close	Easy	published data	Published data: Gauthier 2004: 51
170		Aramas Ikufar	wadi (in)	wadi	mouth	end	meandering	nd	nd	nd	nd	Very remote	Very close	Medium	published data	Published data: Gauthier 2004: 51
24		Bedis	hamada	desert pavement	main	middle	meandering	nd	nd	nd	nd	Very remote	Close	Medium	published data	Published data: Gauthier 2004: 51
25	08/25 C1	Bedis	hamada	fluvial scarp	main	middle	meandering	simple	medium	elevated	absent	Isolated	Very close	Hard	excavation	MCMP
26	09/69 C2	Bedis	hamada	fluvial scarp	main	middle	meandering	simple	medium	elevated	absent	Thinned	Very close	Medium	excavation	MCMP
27	09/69 C1	Bedis	hamada	desert pavement	main	middle	meandering	simple	medium	flat	absent	Thinned	Close	Medium	excavation	MCMP
28	08/18 C1	Bedis	wadi (out)	slope	main	middle	straight	complex	large	flat	multiple	Remote	Far	Medium	survey	MCMP
29	07/28 C1	Bedis	hamada	desert pavement	main	middle	wide bend	simple	small	flat	single	Isolated	Very far	Medium	excavation	MCMP
30	07/79 C1	Bedis	hamada	slope	main	middle	wide bend	double ring	medium	flat	single	Isolated	Very close	Medium	excavation	MCMP
31	08/27 C1	Bedis	hamada	slope	main	middle	wide bend	simple	small	slightly elevated	single	Aggregated	Very close	Medium	survey	MCMP
32	07/68 C1	Bedis	hamada	slope	main	middle	wide bend	simple	medium	slightly elevated	single	Aggregated	Very close	Medium	excavation	MCMP
33	07/59 C1	Bedis	hamada	slope	main	middle	wide bend	nd	small	elevated	single	Thinned	Close	Medium	survey	MCMP
34	08/01 C2	Bedis	hamada	slope	main	middle	meandering	simple	medium	elevated	single	Aggregated	Very close	Hard	excavation	MCMP
35	08/01 C1	Bedis	hamada	slope	main	middle	meandering	simple	medium	flat	single	Aggregated	Close	Hard	excavation	MCMP
36	07/39 C6	Bedis	hamada	outcrop	main	middle	wide bend	simple	small	elevated	single	Aggregated	Close	Hard	excavation	MCMP
37	07/39 C5	Bedis	hamada	desert pavement	main	middle	wide bend	simple	small	flat	multiple	Aggregated	Far	Hard	excavation	MCMP
38	07/42 C1	Bedis	hamada	outcrop	main	middle	wide bend	simple	medium	slightly elevated	single	Thinned	Close	Hard	survey	MCMP
39	07/10 C1	Bedis	hamada	outcrop	main	middle	wide bend	complex	medium	elevated	multiple	Thinned	Close	Hard	excavation	MCPM
40	07/37 C2	Bedis	hamada	outcrop	main	middle	wide bend	simple	medium	elevated	absent	Thinned	Very close	Medium	survey	MCMP
41	07/39 C4	Bedis	hamada	desert pavement	main	middle	wide bend	complex	medium	flat	multiple engraved	Aggregated	Far	Hard	excavation	MCMP
42	07/39 C3	Bedis	hamada	desert pavement	main	middle	wide bend	double ring	medium	flat	single engraved	Aggregated	Far	Hard	excavation	MCMP
43	07/37 C1	Bedis	hamada	outcrop	main	middle	wide bend	simple	medium	elevated	single	Thinned	Very close	Medium	excavation	MCMP
44	07/39 C2	Bedis	hamada	desert pavement	main	middle	wide bend	complex	medium	elevated	multiple	Aggregated	Far	Hard	excavation	MCMP
45	07/11 C1	Bedis	hamada	fluvial scarp	main	middle	wide bend	simple	medium	elevated	absent	Thinned	Very close	Hard	excavation	MCMP
46	07/40 C1	Bedis	hamada	desert pavement	main	middle	wide bend	simple	small	flat	single	Aggregated	Far	Hard	excavation	MCMP
47	07/39 C1	Bedis	hamada	desert pavement	main	middle	wide bend	simple	medium	slightly elevated	absent	Aggregated	Far	Hard	excavation	MCMP
48	07/43 C1	Bedis	hamada	outcrop	main	middle	wide bend	simple	small	slightly elevated	single	Thinned	Close	Medium	survey	MCMP
84		Ibaritran	wadi (out)	slope	confluence	middle	meandering	nd	nd	nd	nd	Very remote	Close	Medium	published data	Published data: Gauthier 2004: 51
15		Imartawen	hamada	desert pavement	main	middle	meandering	nd	nd	nd	nd	Remote	Far	Easy	published data	Published data: Gauthier 2004: 51
17	07/83 C1	Imartawen	hamada	fluvial scarp	main	middle	meandering	simple	medium	elevated	single	Remote	Very close	Easy	excavation	MCMP
97		Imrawen	hamada	slope	tributary	origin	meandering	nd	nd	nd	nd	Very remote	Very close	Easy	published data	Published data: Gauthier 2004: 51
98		Imrawen	hamada	desert pavement	tributary	middle	meandering	nd	nd	nd	nd	Aggregated	Close	Easy	A & A.M.Van Albada courtesy	Unpublished data: A & A.M. Van Albada
99		Imrawen	hamada	desert pavement	tributary	middle	meandering	nd	nd	nd	nd	Aggregated	Close	Easy	A & A.M.Van Albada courtesy	Unpublished data: A & A.M. Van Albada
100		Imrawen	hamada	desert pavement	tributary	middle	meandering	nd	nd	nd	nd	Aggregated	Close	Easy	A & A.M.Van Albada courtesy	Unpublished data: A & A.M. Van Albada
103		Imrawen	hamada	slope	tributary	middle	meandering	simple	nd	nd	nd	Aggregated	Close	Easy	published data	Published data: Van Albada 2000
104		Imrawen	hamada	slope	tributary	middle	meandering	simple	medium	elevated	single	Aggregated	Close	Easy	published data	Published data: Van Albada 2000
105		Imrawen	hamada	desert pavement	tributary	origin	meandering	nd	nd	nd	nd	Isolated	Far	Easy	A & A.M.Van Albada courtesy	Unpublished data: A & A.M. Van Albada
106		Imrawen	hamada	desert pavement	tributary	origin	meandering	simple	medium	slightly elevated	single	Isolated	Close	Easy	published data	Published data: Gauthier 2004: 49 fig. 10
107		Imrawen	hamada	outcrop	tributary	middle	meandering	simple	medium	flat	single	Aggregated	Close	Easy	published data	Published data: Gauthier 2004: 49 fig. 10
108		Imrawen	hamada	outcrop	tributary	middle	meandering	simple	large	flat	absent	Aggregated	Close	Easy	published data	Published data: Gauthier 2004: 49 fig. 10
109		Imrawen	wadi (out)	slope	main	middle	meandering	simple	medium	elevated	single	Isolated	Very close	Medium	survey	The Italian Archaeological Mission in the Sahara archive
110		Imrawen	hamada	desert pavement	main	middle	meandering	simple	medium	slightly elevated	single	Isolated	Very close	Easy	survey	The Italian Archaeological Mission in the Sahara archive
190		In Afuda	wadi (out)	wadi	main	end	meandering	simple	medium	elevated	single	Isolated	Very close	Medium	published data	Published data: Van Albada 1994
191		In Afuda	hamada	desert pavement	main	end	meandering	simple	medium	elevated	single	Isolated	Very close	Medium	published data	Published data: Van Albada 1994
192		In Afuda	wadi (out)	fluvial scarp	main	end	meandering	simple	nd	elevated	single	Aggregated	Very close	Medium	published data	Published data: Van Albada 1994
193		In Afuda	wadi (out)	fluvial scarp	main	end	meandering	nd	nd	nd	single	Aggregated	Very close	Medium	published data	Published data: Van Albada 1994
113		In Aramas	hamada	outcrop	main	end	meandering	nd	nd	nd	single	Very remote	Very close	Easy	A & A.M.Van Albada courtesy	Unpublished data: A & A.M. Van Albada
115		In Aramas	wadi (in)	wadi	main	middle	meandering	complex	medium	flat	multiple	Isolated	Very close	Medium	published data	Published data: Gauthier 2004: 47 fig. 3b
116		In Aramas	hamada	desert pavement	main	middle	meandering	nd	nd	nd	single engraved	Isolated	Far	Easy	A & A.M.Van Albada courtesy	Unpublished data: A & A.M. Van Albada
73		In Elobu	hamada	slope	tributary	middle	meandering	simple	large	slightly elevated	single engraved	Very remote	Very far	Medium	survey	MCMP
52	09/36 C1	In Erahar	hamada	slope	main	middle	meandering	simple	large	elevated	absent	Isolated	Very close	Hard	survey	MCMP
53	07/32 C1	In Erahar	hamada	slope	main	middle	meandering	double ring	medium	flat	absent	Thinned	Close	Hard	survey	MCMP
54	07/110 C1	In Erahar	hamada	slope	main	middle	meandering	simple	medium	elevated	single	Thinned	Very close	Hard	excavation	MCMP
57		In Erahar	wadi (out)	slope	main	middle	meandering	complex	large	slightly elevated	multiple	Remote	Very close	Medium	published data	Unpublished data: A & A.M. Van Albada
58		In Erahar	wadi (in)	slope	main	middle	meandering	double ring	large	flat	single	Remote	Very close	Medium	published data	Unpublished data: A & A.M. Van Albada
16		In Erkni	wadi (out)	slope	main	middle	meandering	nd	nd	nd	nd	Very remote	Far	Medium	published data	Published data: Gauthier 2004: 51
23		In Erkni	wadi (out)	slope	main	middle	meandering	nd	nd	nd	nd	Very remote	Close	Medium	published data	Published data: Gauthier 2004: 51
1		In Geragiuen	wadi (out)	slope	confluence	middle	meandering	nd	nd	nd	nd	Very remote	Very far	Medium	published data	Published data: Gauthier 2004: 51
139	10/614 C1	In Hagarin	hamada	slope	main	middle	meandering	complex	large	slightly elevated	multiple	Very remote	Far	Easy	survey	MCMP
140		In Hagarin	wadi (out)	slope	main	end	meandering	simple	medium	flat	single engraved	Aggregated	Very close	Medium	published data	Published data: Gauthier 2004: 47 fig. 3b
141		In Hagarin	wadi (out)	slope	main	end	meandering	simple	medium	flat	single	Aggregated	Very close	Medium	published data	Published data: Gauthier 2004: 47 fig. 3b
142		In Hagarin	wadi (out)	slope	main	end	meandering	nd	nd	nd	single engraved	Isolated	Far	Medium	published data	Published data: Gauthier 2004: 51
18		In Taghramt	hamada	fluvial scarp	main	middle	meandering	nd	nd	nd	nd	Very remote	Very close	Easy	published data	Published data: Gauthier 2004: 51
194	10/312 C1	In Tanait	wadi (out)	wadi	mouth	end	meandering	simple	medium	slightly elevated	absent	Very remote	Very far	Medium	survey	MCMP
195		In Tanait	wadi (out)	outcrop	tributary	end	meandering	nd	nd	nd	nd	Very remote	Far	Medium	published data	Published data: Gauthier 2004: 51
4		Isser	hamada	slope	main	middle	meandering	nd	nd	nd	nd	Remote	Close	Easy	published data	Published data: Gauthier 2004: 51
7		Isser	wadi (in)	wadi	main	middle	meandering	nd	nd	nd	nd	Remote	Very close	Medium	published data	Published data: Gauthier 2004: 51
196		Marhadjeli	hamada	fluvial scarp	main	end	meandering	nd	nd	nd	single engraved	Isolated	Very close	Medium	published data	Published data: Gauthier 2004: 51
197		Marhadjeli	hamada	desert pavement	main	middle	meandering	nd	nd	nd	single engraved	Isolated	Very close	Medium	published data	Published data: Van Albada 2000: 134
89		Meseknan	hamada	desert pavement	main	middle	meandering	nd	nd	nd	nd	Isolated	Close	Easy	A & A.M.Van Albada courtesy	Unpublished data: A & A.M. Van Albada
90		Meseknan	hamada	desert pavement	main	middle	meandering	complex	nd	nd	single	Isolated	Close	Easy	A & A.M.Van Albada courtesy	Unpublished data: A & A.M. Van Albada
91		Meseknan	hamada	desert pavement	main	middle	meandering	nd	large	nd	nd	Isolated	Close	Easy	published data	Published data: Van Albada 2000: 124
92		Meseknan	hamada	desert pavement	main	middle	meandering	nd	nd	nd	nd	Isolated	Close	Easy	A & A.M.Van Albada courtesy	Unpublished data: A & A.M. Van Albada
93		Meseknan	hamada	desert pavement	main	middle	meandering	nd	nd	nd	nd	Isolated	Far	Easy	A & A.M.Van Albada courtesy	Unpublished data: A & A.M. Van Albada
94		Meseknan	hamada	slope	confluence	middle	meandering	nd	nd	nd	nd	Remote	Very far	Easy	published data	Published data: Gauthier 2004: 51
96		Meseknan	hamada	desert pavement	confluence	middle	meandering	nd	nd	nd	single	Very remote	Close	Easy	published data	Published data: Gauthier 2004: 54 fig. 17a
95		Meseknan affl k3	hamada	outcrop	tributary	middle	meandering	nd	nd	nd	nd	Very remote	Close	Easy	A & A.M.Van Albada courtesy	Unpublished data: A & A.M. Van Albada
68		Takabart Kabort	wadi (in)	slope	tributary	end	meandering	nd	nd	nd	nd	Very remote	Very close	Medium	published data	Published data: Gauthier 2004: 51
69	07/55 C2	Takabart Kabort	hamada	outcrop	main	end	meandering	complex	medium	flat	absent	Aggregated	Very close	Medium	excavation	MCMP
70	07/55 C1	Takabart Kabort	hamada	outcrop	main	end	meandering	complex	medium	flat	multiple	Aggregated	Close	Medium	excavation	MCMP
118		Taleschout	hamada	outcrop	main	middle	meandering	nd	nd	nd	nd	Thinned	Close	Easy	published data	Published data: Gauthier 2004: 51
119		Taleschout	hamada	outcrop	main	middle	meandering	nd	nd	nd	nd	Thinned	Very close	Easy	published data	Published data: Gauthier 2004: 51
120		Taleschout	hamada	outcrop	main	end	meandering	nd	nd	nd	single engraved	Very remote	Close	Easy	published data	Published data: Gauthier 2004: 51
121		Taleschout	wadi (out)	slope	main	middle	meandering	nd	nd	nd	nd	Isolated	Close	Medium	A & A.M.Van Albada courtesy	Unpublished data: A & A.M. Van Albada
122		Taleschout	hamada	outcrop	main	middle	meandering	nd	nd	nd	nd	Isolated	Very close	Easy	published data	Published data: Gauthier 2004: 51
123		Taleschout	hamada	outcrop	main	middle	meandering	complex	medium	flat	multiple engraved	Aggregated	Close	Medium	published data	Published data: Gauthier 2004: 47 fig. 3b
124		Taleschout	hamada	outcrop	main	middle	meandering	simple	medium	flat	single	Aggregated	Close	Medium	published data	Published data: Gauthier 2004: 47 fig. 3b
125		Taleschout	hamada	outcrop	main	middle	meandering	complex	medium	flat	multiple	Aggregated	Close	Medium	published data	Published data: Gauthier 2004: 47 fig. 3b
126		Taleschout	hamada	outcrop	main	middle	meandering	simple	small	flat	single	Aggregated	Close	Medium	published data	Published data: Gauthier 2004: 47 fig. 3b
127		Taleschout	hamada	outcrop	main	middle	meandering	complex	medium	flat	multiple	Aggregated	Close	Medium	published data	Published data: Gauthier 2004: 47 fig. 3b
128		Taleschout	hamada	outcrop	main	middle	meandering	simple	medium	flat	multiple	Aggregated	Close	Medium	published data	Published data: Gauthier 2004: 47 fig. 3b
129		Taleschout	hamada	outcrop	main	middle	meandering	double ring	small	flat	single	Aggregated	Close	Medium	published data	Published data: Gauthier 2004: 47 fig. 3b
130		Taleschout	hamada	outcrop	main	middle	meandering	simple	small	flat	single	Aggregated	Close	Medium	published data	Published data: Gauthier 2004: 47 fig. 3b
131		Taleschout	hamada	outcrop	main	middle	meandering	simple	small	flat	single	Aggregated	Close	Medium	published data	Published data: Gauthier 2004: 47 fig. 3b
132		Taleschout	hamada	outcrop	main	middle	meandering	simple	small	flat	single	Aggregated	Close	Medium	published data	Published data: Gauthier 2004: 47 fig. 3b
133		Taleschout	hamada	outcrop	main	middle	meandering	complex	medium	flat	multiple	Aggregated	Close	Medium	published data	Published data: Gauthier 2004: 47 fig. 3b
134		Taleschout	hamada	fluvial scarp	main	middle	meandering	nd	nd	nd	nd	Thinned	Very close	Easy	published data	Published data: Gauthier 2004: 51
135		Taleschout	hamada	fluvial scarp	main	middle	meandering	nd	nd	nd	nd	Thinned	Very close	Easy	published data	Published data: Gauthier 2004: 51
136		Taleschout	wadi (out)	outcrop	main	end	meandering	nd	nd	nd	nd	Very remote	Very close	Medium	A & A.M.Van Albada courtesy	Unpublished data: A & A.M. Van Albada
137		Taleschout	wadi (out)	slope	main	end	meandering	nd	nd	nd	nd	Remote	Close	Medium	published data	Published data: Gauthier 2004: 51
138		Taleschout	hamada	desert pavement	main	end	meandering	nd	nd	nd	single engraved	Remote	Close	Medium	published data	Published data: Gauthier 2004: 51
114		Talighora	wadi (out)	slope	main	middle	meandering	nd	nd	nd	nd	Very remote	Close	Medium	published data	Published data: Gauthier 2004: 51
55		Tazelak	hamada	desert pavement	main	origin	meandering	nd	nd	nd	nd	Very remote	Close	Easy	published data	Published data: Gauthier 2004: 51
157	10/485 C1	Tehi-n-Tilemsin	hamada	desert pavement	tributary	origin	meandering	simple	medium	slightly elevated	single	Very remote	Far	Easy	survey	MCMP
167		Tehi-n-Tilemsin	wadi (out)	desert pavement	tributary	end	meandering	nd	nd	nd	nd	Very remote	Very close	Medium	published data	Published data: Gauthier 2004: 51
2		Tekni-Tan-Tameslemt	hamada	slope	main	middle	meandering	nd	nd	nd	nd	Remote	Close	Easy	published data	Published data: Gauthier 2004: 51
3		Tekni-Tan-Tameslemt	hamada	slope	main	middle	meandering	nd	nd	nd	nd	Remote	Very far	Easy	published data	Published data: Gauthier 2004: 51
5		Tekniewen	wadi (out)	fluvial scarp	main	middle	meandering	nd	nd	nd	single	Remote	Very close	Medium	A & A.M.Van Albada courtesy	Unpublished data: A & A.M. Van Albada
6		Tekniewen	hamada	fluvial scarp	main	middle	meandering	nd	nd	nd	nd	Remote	Very close	Easy	A & A.M.Van Albada courtesy	Unpublished data: A & A.M. Van Albada
75		Tidoma	wadi (in)	slope	tributary	middle	meandering	complex	large	flat	absent	Remote	Very close	Medium	published data	Published data: Ponti 2001: 132-135
168	10/075 C1	Tilemsin	wadi (out)	slope	mouth	end	meandering	nd	large	flat	absent	Very remote	Very close	Medium	survey	MCMP
71		Tilizaghen	hamada	fluvial scarp	main	middle	meandering	simple	medium	elevated	single engraved	Very remote	Very close	Medium	published data	Published data: Gauthier 2004: 51
72		Tilizaghen	hamada	slope	main	middle	meandering	nd	nd	nd	single engraved	Very remote	Close	Medium	published data	Published data: Van Albada 2000: fig 32 vedere pagina
74		Tilizaghen	hamada	fluvial scarp	main	middle	meandering	nd	nd	nd	single engraved	Remote	Very close	Medium	published data	Published data: Gauthier 2004: 51
76		Tilizaghen	wadi (out)	slope	confluence	middle	meandering	nd	large	nd	single engraved	Remote	Close	Medium	published data	Published data: Van Albada 1995: 8
77		Tilizaghen	hamada	slope	main	middle	straight	nd	nd	nd	nd	Remote	Very close	Easy	published data	Published data: Gauthier 2004: 51
78		Tilizaghen	wadi (out)	slope	main	middle	straight	simple	small	elevated	single	Aggregated	Close	Medium	published data	Published data: Gauthier 2004: 51
79		Tilizaghen	wadi (out)	slope	main	middle	straight	simple	small	elevated	single	Aggregated	Close	Medium	published data	Published data: Gauthier 2004: 51
80		Tilizaghen	wadi (out)	slope	main	middle	straight	simple	small	flat	single	Aggregated	Close	Medium	published data	Published data: Gauthier 2004: 51
81		Tilizaghen	wadi (out)	slope	main	middle	straight	simple	small	flat	single	Aggregated	Close	Medium	published data	Published data: Gauthier 2004: 51
82		Tilizaghen	wadi (out)	slope	main	middle	straight	simple	small	flat	single	Aggregated	Close	Medium	published data	Published data: Gauthier 2004: 51
83		Tilizaghen	wadi (out)	slope	main	middle	straight	simple	small	flat	single	Aggregated	Close	Medium	published data	Published data: Gauthier 2004: 51
111		Tilwa	wadi (out)	slope	main	middle	meandering	nd	nd	nd	single	Very remote	Very close	Medium	A & A.M.Van Albada courtesy	Unpublished data: A & A.M. Van Albada
112		Tilwa	hamada	desert pavement	main	middle	meandering	nd	nd	nd	nd	Very remote	Very far	Easy	published data	Published data: Gauthier 2004: 51
85		Tin Amutin	hamada	slope	main	middle	meandering	nd	nd	nd	nd	Isolated	Close	Medium	published data	Published data: Gauthier 2004: 51
86		Tin Amutin	hamada	slope	main	middle	meandering	complex	large	flat	single engraved	Isolated	Close	Easy	published data	Published data: Van Albada 2000: 102;Gauthier 2004: 47 fig. 3b
87		Tin Amutin	hamada	slope	main	middle	wide bend	nd	nd	nd	nd	Very remote	Very close	Medium	published data	Published data: Gauthier 2004: 51
88		Tin Amutin	hamada	desert pavement	main	middle	meandering	nd	nd	nd	nd	Isolated	Far	Medium	published data	Published data: Gauthier 2004: 51
49	00/556	Tin Einessnis	hamada	slope	main	middle	meandering	simple	small	elevated	multiple engraved	Very remote	Far	Medium	excavation	MSRS 2000
20	00/301a	Tin Einessnis sud	hamada	slope	tributary	middle	meandering	simple	small	flat	absent	Isolated	Close	Medium	excavation	MSRS 2000
21	00/300	Tin Einessnis sud	hamada	slope	tributary	middle	meandering	simple	medium	elevated	single	Isolated	Very close	Medium	excavation	MSRS 2000
59		Tin Iblal	hamada	desert pavement	main	middle	meandering	nd	nd	nd	nd	Remote	Far	Medium	published data	Published data: Gauthier 2004: 51
60		Tin Iblal	hamada	desert pavement	main	middle	meandering	simple	medium	elevated	single engraved	Aggregated	Very close	Medium	published data	Published data: Wagner and Le Quellec 1995
61		Tin Iblal	hamada	desert pavement	main	middle	meandering	simple	medium	elevated	single	Aggregated	Close	Medium	published data	Published data: Wagner and Le Quellec 1995
62		Tin Iblal	hamada	desert pavement	main	middle	meandering	nd	nd	nd	nd	Aggregated	Close	Medium	published data	Published data: Gauthier 2004: 51
63		Tin Iblal	hamada	desert pavement	main	middle	meandering	simple	medium	elevated	single	Thinned	Close	Medium	published data	Published data: Wagner and Le Quellec 1995
64		Tin Iblal	hamada	desert pavement	main	middle	meandering	nd	nd	nd	nd	Thinned	Close	Medium	published data	Published data: Gauthier 2004: 51
65		Tin Iblal	hamada	endorheic depression	main	middle	meandering	complex	large	flat	multiple	Isolated	Very far	Medium	published data	Published data: Gauthier 1998: 136; Gauthier 2004: 47 fig. 3b
66		Tin Iblal	hamada	endorheic depression	main	middle	meandering	complex	medium	flat	multiple	Isolated	Very far	Medium	published data	Published data: Gauthier 2004: 45 fig. 2 e pag. 47 fig. 3b
67		Tin Iblal	hamada	fluvial scarp	main	middle	meandering	nd	nd	nd	nd	Isolated	Very close	Medium	published data	Published data: Gauthier 2004: 51
101		Tin Kiwa	hamada	desert pavement	main	middle	meandering	nd	nd	nd	nd	Remote	Very close	Medium	A & A.M.Van Albada courtesy	Unpublished data: A & A.M. Van Albada
102		Tin Kiwa	hamada	desert pavement	main	middle	meandering	nd	nd	nd	nd	Remote	Very close	Easy	A & A.M.Van Albada courtesy	Unpublished data: A & A.M. Van Albada
143		Tin Sharuma	hamada	slope	main	end	meandering	nd	nd	nd	nd	Thinned	Close	Easy	published data	Published data: Gauthier 2004: 51
144		Tin Sharuma	hamada	slope	main	end	meandering	nd	nd	nd	nd	Thinned	Close	Easy	published data	Published data: Gauthier 2004: 51
145		Tin Sharuma	wadi (in)	wadi	main	end	meandering	nd	nd	nd	nd	Remote	Very close	Medium	published data	Published data: Gauthier 2004: 51
146		Tin Sharuma	hamada	slope	main	end	meandering	nd	nd	nd	nd	Very remote	Close	Easy	published data	Published data: Gauthier 2004: 51
147		Tin Sharuma	hamada	desert pavement	main	end	meandering	simple	medium	flat	single engraved	Aggregated	Close	Easy	A & A.M.Van Albada courtesy	Unpublished data: A & A.M. Van Albada
148		Tin Sharuma	hamada	desert pavement	main	end	meandering	simple	medium	flat	absent	Aggregated	Close	Easy	A & A.M.Van Albada courtesy	Unpublished data: A & A.M. Van Albada
149		Tin Sharuma	hamada	desert pavement	main	end	meandering	simple	medium	flat	absent	Aggregated	Close	Easy	A & A.M.Van Albada courtesy	Unpublished data: A & A.M. Van Albada
150		Tin Sharuma	hamada	desert pavement	main	end	meandering	complex	medium	flat	single	Aggregated	Close	Easy	A & A.M.Van Albada courtesy	Unpublished data: A & A.M. Van Albada
151		Tin Sharuma	hamada	desert pavement	main	end	meandering	nd	nd	nd	single engraved	Remote	Far	Easy	A & A.M.Van Albada courtesy	Unpublished data: A & A.M. Van Albada
152		Tin Sharuma	hamada	slope	main	end	meandering	complex	large	slightly elevated	multiple engraved	Aggregated	Close	Medium	published data	Published data: Van Albada 1995: 8
153		Tin Sharuma	hamada	slope	main	end	meandering	simple	medium	elevated	single	Aggregated	Close	Medium	A & A.M.Van Albada courtesy	Unpublished data: A & A.M. Van Albada
154		Tin Sharuma	hamada	slope	main	end	meandering	simple	small	slightly elevated	absent	Aggregated	Close	Medium	A & A.M.Van Albada courtesy	Unpublished data: A & A.M. Van Albada
155		Tin Sharuma	hamada	slope	main	end	meandering	simple	medium	slightly elevated	nd	Aggregated	Close	Medium	A & A.M.Van Albada courtesy	Unpublished data: A & A.M. Van Albada
156		Tin Sharuma	hamada	desert pavement	main	middle	meandering	complex	large	slightly elevated	absent	Remote	Very close	Medium	published data	Published data: Gauthier 2004: 51
158		Tin Sharuma	hamada	desert pavement	main	middle	meandering	simple	medium	elevated	single	Aggregated	Very close	Medium	A & A.M.Van Albada courtesy	Unpublished data: A & A.M. Van Albada
159		Tin Sharuma	hamada	desert pavement	main	middle	meandering	simple	medium	elevated	single	Aggregated	Very close	Medium	A & A.M.Van Albada courtesy	Unpublished data: A & A.M. Van Albada
160		Tin Sharuma	hamada	desert pavement	main	middle	meandering	simple	large	elevated	multiple	Aggregated	Very close	Medium	A & A.M.Van Albada courtesy	Unpublished data: A & A.M. Van Albada
161		Tin Sharuma	hamada	slope	main	middle	meandering	simple	large	flat	single	Remote	Close	Easy	A & A.M.Van Albada courtesy	Unpublished data: A & A.M. Van Albada
162		Tin Sharuma	hamada	fluvial scarp	main	middle	meandering	simple	small	flat	single engraved	Aggregated	Very close	Easy	A & A.M.Van Albada courtesy	Unpublished data: A & A.M. Van Albada
163		Tin Sharuma	hamada	fluvial scarp	main	middle	meandering	simple	small	flat	single	Aggregated	Very close	Easy	A & A.M.Van Albada courtesy	Unpublished data: A & A.M. Van Albada
164		Tin Sharuma	hamada	fluvial scarp	main	middle	meandering	simple	small	flat	single	Aggregated	Very close	Easy	A & A.M.Van Albada courtesy	Unpublished data: A & A.M. Van Albada
165		Tin Sharuma	hamada	fluvial scarp	main	middle	meandering	simple	small	flat	single	Aggregated	Very close	Easy	A & A.M.Van Albada courtesy	Unpublished data: A & A.M. Van Albada
166		Tin Sharuma	hamada	fluvial scarp	main	middle	meandering	simple	medium	slightly elevated	single	Isolated	Very close	Easy	A & A.M.Van Albada courtesy	Unpublished data: A & A.M. Van Albada
50	07/120 C1	Tin Zea	wadi (in)	wadi	main	middle	meandering	nd	medium	slightly elevated	nd	Isolated	Very close	Medium	survey	MCMP
51		Tin Zea	hamada	outcrop	tributary	middle	meandering	nd	nd	nd	nd	Isolated	Very close	Medium	published data	Published data: Gauthier 2004: 51
