# Supplementary material for: Inside the “African Cattle Complex”: Animal Burials in the Holocene Central Sahara
Source: PLoS One. 2013 Feb 20;8(2):e56879. doi: 10.1371/journal.pone.0056879 (PMC3577651; doi:10.1371/journal.pone.0056879)
Supplement: Table S2 — Main features of the surveyed contexts in Northern Messak Settafet. (XLSX) [file pone.0056879.s004.xlsx]

## Sheet: Foglio1
Field Code	Transect	Physiography	Cultural Attribution	Type of context	Notes
00/300	Tin Einessnis 1	Plateau	MP	Corbeille
00/301	Tin Einessnis 1	Plateau	MP	Tumulus
00/301a	Tin Einessnis 1	Plateau	MP	Corbeille
00/451	Tin Einessnis 1	Wadi bank	FP/G	Settlement
00/452	Tin Einessnis 1	Wadi bank	FP/G	Settlement
00/453	Tin Einessnis 1	Wadi bank	FP/G	Settlement
00/454	Tin Einessnis 1	Wadi bank	FP/G	Settlement
00/455	Tin Einessnis 1	Wadi bank	FP/G	Settlement
00/456	Tin Einessnis 1	Wadi bank	FP/G	Settlement
00/458	Tin Einessnis 1	Wadi bank	FP/G	Tumulus
00/605	Tin Einessnis 2	Wadi bank	MP/LP	Tumulus
00/604	Tin Einessnis 2	Wadi bank	MP/LP	Tumulus
00/603	Tin Einessnis 2	Wadi bank	LP	Stone platform
00/602	Tin Einessnis 2	Wadi bank	FP/G	Stone platform
00/601	Tin Einessnis 2	Wadi bank	P	Stone ring
00/600	Tin Einessnis 2	Wadi bank	MP	Stone ring
00/599	Tin Einessnis 2	Wadi bank	P	Tumulus
00/598	Tin Einessnis 2	Wadi bank	P	Stone mound
00/597	Tin Einessnis 2	Wadi bank	FP/G	Stone mound
00/596	Tin Einessnis 2	Wadi bank	P	Tumulus
00/595	Tin Einessnis 2	Wadi bank	LP	Stone ring
00/594	Tin Einessnis 2	Wadi bank	P	Stone ring
00/560	Tin Einessnis 2	Wadi bank	P	Stone platform
00/559	Tin Einessnis 2	Wadi bank	P	Stone ring
00/558	Tin Einessnis 2	Wadi bank	FP/G	Stone platform
00/557	Tin Einessnis 2	Wadi bank	MP	Stone Platform
00/556	Tin Einessnis 2	Wadi bank	MP	Corbeille
00/554	Tin Einessnis 2	Wadi bank	MP	Allèe couverte
00/553	Tin Einessnis 2	Wadi bank	P	Stone platform
00/552	Tin Einessnis 2	Wadi bank	P	Tumulus
00/551	Tin Einessnis 2	Wadi bank	P	Stone platform
00/448	Tin Einessnis 2	Wadi bank	P	Tumulus
07/01	Transect 2	Wadi bed	H	Stone mound
07/02	Transect 2	Slope	H	Stone structure
07/03	Transect 2	Slope	H	Stone structure
07/04	Transect 2	Slope	H	Stone structures	2 stone structures
07/05	Transect 2	Slope	H	Stone structure
07/84	Transect 3	Wadi bank	H	Redjem
07/89	Transect 3	Plateau edge	H	Redjem	3 redjem
09/54	Transect 3	Plateau	H	Redjem
07/81	Transect 3	Slope	H	Settlement
07/91	Transect 3	Wadi bed	H	Settlement
07/88	Transect 3	Slope Wadi bank	H	Stone structures	2 stone structures
07/92	Transect 3	Plateau	H	Stone structure
09/55	Transect 3	Plateau	H	Stone structure
07/86	Transect 3	Plateau edge	LP/FP	Stone structure
07/85	Transect 3	Plateau edge	LP/FP	Tumulus
07/93	Transect 3	Slope	LP/FP	Tumulus
07/96	Transect 3	Slope	LP/FP	tumulus
07/97	Transect 3	Wadi bank	LP/FP	tumulus
07/87	Transect 3	Plateau edge	LP/FP	Tumulus
07/83	Transect 3	Plateau edge	MP	Corbeille
09/57	Transect 3	Plateau	P	Stone structure
09/60	Transect 3	Plateau	P	Stone structures	2 stone structures
09/62	Transect 3		P	Stone structure
09/65	Transect 3	Plateau	P	Tumulus
09/56	Transect 3		H	Redjem
09/61	Transect 3	Plateau	H	Redjem
09/63	Transect 3	Plateau edge	H	Redjem
09/64	Transect 3	Plateau	H	Stone structure
09/58	Transect 3	Plateau	P	Settlement
09/51	Transect 4	Endorheic depression	P	Tethering stones (2)
09/48	Transect 4	Endorheic depression	P	Stone structure
09/47	Transect 4	Endorheic depression	P	Settlement
09/45	Transect 4	Endorheic depression	P	Settlement
09/34	Transect 4	Endorheic depression	P	Settlement
09/33	Transect 4	Endorheic depression	H	Settlement
09/31	Transect 4	Endorheic depression	P	Settlement
07/35	Transect 4	Endorheic depression	P	Settlement
07/34	Transect 4	Endorheic depression	P	Settlement
09/84	Transect 4	Plateau	H	Redjem
09/83	Transect 4	Plateau	P	Tumulus
09/79	Transect 4	Plateau	P	Redjem
09/78	Transect 4	Plateau	G	Stone structure
09/77	Transect 4	Plateau	H	Redjem
09/76	Transect 4	Plateau	P	Tumulus
09/74	Transect 4	Plateau	H	Redjem
09/73	Transect 4	Plateau	H	Stone structure
09/72	Transect 4	Plateau	H	Redjem
09/71	Transect 4	Plateau	P	Tumulus
09/53	Transect 4	Plateau	H	Redjem
09/50	Transect 4	Plateau	H	Redjem
09/49	Transect 4	Plateau	P	Stone structure
09/46	Transect 4	Plateau	H	Stone structure
09/44	Transect 4	Plateau	P	Stone structure
09/43	Transect 4	Plateau	H	Stone structure
09/42	Transect 4	Plateau	P	Stone structure
09/41	Transect 4	Plateau	LP/FP	Tumulus
09/40	Transect 4	Plateau	P	Stone structures	2 stone structures
09/36	Transect 4	Plateau	P	Corbeille
09/30	Transect 4	Plateau	P	Stone structure
09/29	Transect 4	Plateau	LP/FP	Tumulus
09/27	Transect 4	Plateau	P	Stone structure
09/26	Transect 4	Plateau	P	Tumulus
09/24	Transect 4	Plateau	P	Settlement
09/22	Transect 4	Plateau	P	Stone structure
08/19	Transect 4	Plateau	H	Stone structure
08/06	Transect 4	Plateau	P	Tumulus
07/72	Transect 4	Plateau	P	Stone structure
07/71	Transect 4	Plateau	LP/FP	Tumulus
07/70	Transect 4	Plateau	LP/FP	Tumulus
07/65	Transect 4	Plateau	P	Stone structure
07/64	Transect 4	Plateau	P	Stone structure
07/59	Transect 4	Plateau	MP	Corbeille
07/33	Transect 4	Plateau	H	Settlement
07/31	Transect 4	Plateau	H	Redjem
07/29	Transect 4	Plateau	P	Tumulus
07/28	Transect 4	Plateau	MP	Corbeille
07/130	Transect 4	Plateau	P	Tumulus
07/124	Transect 4	Plateau	H	Redjem	2 redjem
07/123	Transect 4	Plateau	MP	Tumulus
07/121	Transect 4	Plateau	H	Settlement
07/118	Transect 4	Plateau	MP	Tumulus
0/36	Transect 4	Plateau	P	Stone structure
09/80	Transect 4	Plateau edge	H	Redjem
08/27	Transect 4	Plateau edge	MP	Corbeille
08/26	Transect 4	Plateau edge	P	Tumulus
08/18	Transect 4	Plateau edge	MP	Corbeille
08/17	Transect 4	Plateau edge	H	Stone structure
08/07	Transect 4	Plateau edge	P	Tumulus
0713	Transect 4	Plateau edge	H	Stone structure
07/99	Transect 4	Plateau edge	H	Redjem	3 redjem
07/80	Transect 4	Plateau edge	H	Stone structure
07/79	Transect 4	Plateau edge	MP	Corbeille
07/68	Transect 4	Plateau edge	MP	Corbeille
07/56	Transect 4	Plateau edge	H	Redjem
07/27	Transect 4	Plateau edge	P	Tumulus
07/128	Transect 4	Plateau edge	LP/FP	Stone structure
07/127	Transect 4	Plateau edge	LP/FP	Tumulus
07/126	Transect 4	Plateau edge	H	Stone structure
07/125	Transect 4	Plateau edge	H	Stone structure
07/113	Transect 4	Plateau edge	LP/FP	Tumulus
07/110	Transect 4	Plateau edge	MP	Corbeille
07/11	Transect 4	Plateau edge	MP	Corbeille
07/104	Transect 4	Plateau edge	LP/FP	Tumulus
07/102	Transect 4	Plateau edge	LP/FP	Stone structure
07/101	Transect 4	Plateau edge	LP/FP	Tumulus
07/10	Transect 4	Plateau edge	MP	Corbeille
09/87	Transect 4	Slope	P	Tumulus
09/86	Transect 4	Slope	P	Tumulus
09/85	Transect 4	Slope	P	Tumulus
09/81	Transect 4	Slope	G	Tumulus
08/20	Transect 4	Slope	P	Tumulus
07/98	Transect 4	Slope	P	Tumulus
07/43	Transect 4	Slope	P	Corbeille
07/42	Transect 4	Slope	P	Corbeille
07/40	Transect 4	Slope	P	Settlement
07/40 C1	Transect 4	Slope	MP	Corbeille
07/39	Transect 4	Slope	MP	Corbeilles	6 corbeilles
07/38	Transect 4	Slope	P	Tumuli	2 tumuli
07/26	Transect 4	Slope	H	Stone structures	3 stone structures
07/24	Transect 4	Slope	P	Stone structure
07/23	Transect 4	Slope	P	Tumulus
07/22	Transect 4	Slope	P	Tumulus
07/16	Transect 4	Slope	P	Tumulus
07/14	Transect 4	Slope	P	Stone structure
07/120	Transect 4	Slope	LP/FP	Corbeille
07/12	Transect 4	Slope	H	Redjem	3 redjem
07/116	Transect 4	Slope	LP/FP	Tumulus
07/115	Transect 4	Slope	LP/FP	Tumuli	2 tumuli
07/114	Transect 4	Slope	LP/FP	Tumuli	2 tumuli
07/112	Transect 4	Slope	LP/FP	Tumulus
07/108	Transect 4	Slope	H	Stone structure
07/107	Transect 4	Slope	LP/FP	Tumulus
07/106	Transect 4	Slope	H	Stone structures	2 stone structures
07/08	Transect 4	Slope	P	Tumuli	2 tumuli
07/06	Transect 4	Slope	P	Tumulus
07/41	Transect 4	Slope Wadi bank	P	Stone structures	2 stone structures
07/117	Transect 4	Slope Wadi bank	LP/FP	Tumulus
07/100	Transect 4	Slope Wadi bank	LP	Stone structures	2 stone structures
09/38	Transect 4	Wadi bank	P	Settlement
07/77	Transect 4	Wadi bank	H	Redjem
07/57	Transect 4	Wadi bank	P	Tumulus
07/37	Transect 4	Wadi bank	MP	Corbeilles	2 corbeilles
07/37 T1	Transect 4	Wadi bank	P	Tumulus
07/32	Transect 4	Wadi bank	MP	Corbeille
07/25	Transect 4	Wadi bank	LP	Tumulus
07/15	Transect 4	Wadi bank	H	Redjem
07/105	Transect 4	Wadi bank	LP/FP	Tumulus
07/47	Transect 4	Wadi bed	H	Stone structures	2 stone structures
07/46	Transect 4	Wadi bed	H	Stone structure
07/45	Transect 4	Wadi bed	H	Stone structure
07/44	Transect 4	Wadi bed	H	Stone structure
09/75	Transect 4		MP	Tumulus
09/39	Transect 4		P	Tumulus
07/75	Transect 4		H	Redjem
07/122	Transect 4		H	Stone structure
09/69	Transect 5	Plateau	MP	Corbeilles	2 corbeilles
09/69 T1	Transect 5	Plateau	P	Tumulus
08/01	Transect 5	Plateau	MP	Corbeilles	2 corbeilles
08/25	Transect 5	Plateau edge	MP	Corbeille
09/70	Transect 5	Plateau	P	Redjem
09/66	Transect 5	Plateau	P	Stone structure
09/67	Transect 5	Plateau	H	Stone structure
09/68	Transect 5	Plateau	P	Stone structure
08/08	Transect 5	Plateau	P	Stone structure
08/16	Transect 5	Plateau	P	Stone structure
08/09	Transect 5	Plateau	P	Tumulus
08/10	Transect 5	Plateau	P	Tumulus
08/11	Transect 5	Plateau	LP/FP	Tumulus
08/12	Transect 5	Plateau	P	Tumulus
08/13	Transect 5	Plateau	P	Tumulus
08/14	Transect 5	Plateau	P	Tumulus
08/15	Transect 5	Plateau	G	Tumulus
08/21	Transect 5	Wadi bank	P	Tumulus
08/22	Transect 5	Slope of the hammada	LP/FP	Tumulus
08/23	Transect 5	Slope of the hammada	FP	Tumulus
08/24	Transect 5	Slope Wadi bank	LP/FP	Tumulus
09/21	Transect 6	Plateau	FP/G	Tumulus
07/49	Transect 6	Slope	H	Settlement
09/16	Transect 6	Plateau	H	Settlement
09/17	Transect 6	Endorheic depression	H	Settlement
09/18	Transect 6	Endorheic depression	H	Settlement
09/19	Transect 6	Plateau	LP/FP	Tumulus
09/20	Transect 6	Plateau	LP/FP	Settlement
07/55	Transect 6	Plateau edge	MP	Corbeilles	2 corbeilles
07/55 T1	Transect 6	Plateau edge	MP	Tumulus
07/50	Transect 6	Slope	P	Tumulus
07/54	Transect 6	Slope	P	Tumulus
Early, Middle, Late, Final Pastoral; EP, MP, LP, FP
Pastoral generic: P
Garamantian: G
Historic or recent: H
