# Supplementary material for: Inside the “African Cattle Complex”: Animal Burials in the Holocene Central Sahara
Source: PLoS One. 2013 Feb 20;8(2):e56879. doi: 10.1371/journal.pone.0056879 (PMC3577651; doi:10.1371/journal.pone.0056879)
Supplement: Table S5 — Measurements of cattle and ovicaprines elements (in mm following von den Driesch 1976; * indicates approximate measurements). (XLSX) [file pone.0056879.s007.xlsx]

## Sheet: tavola
Structure	Inv. N.	Species	Element	L	B	GL	Bp	Dp	SD	Bd	Dd	BT	GLP	LG	GD	GLl	GLm	DLS	HP	Ld	MBS
07/39 C2 ext. area	242	Bos taurus	M1 up.	*27.0
07/110 C1	165	Bos taurus	M1 up.	26.7	23.5
07/110 C1	170	Bos taurus	M1 up.	26.6	23.0
07/110 C1	166	Bos taurus	M2 up.	32.8	25.0
07/110 C1	171	Bos taurus	M2 up.	33	25.0
07/55 C1	254	Bos taurus	M2 up.	26.3	19.8
07/55 C1	255	Bos taurus	M2 up.	26.1	19.5
09/69 C1	367	Bos taurus	M3 up.	33	22.7
09/69 C1	375	Bos taurus	M3 up.	32.8	23
07/39 C3	216	Bos taurus	M3 up.	32.4	20.5
07/39 C3	217	Bos taurus	M3 up.	32.0	21.5
07/110 C1	172	Bos taurus	M3 up.	35.0	25.6
07/110 C1	261	Bos taurus	M3 up.	34.0	*22.4
07/55 C1	248	Bos taurus	M3 up.	30.0	19
07/28 C1	178	Bos taurus	M2 low.	28.0
09/69 C1	357	Bos taurus	M3 low.	42.0	14.4
09/69 C1	365	Bos taurus	M3 low.	40.6	13.7
07/28 C1	179	Bos taurus	M3 low.	44.9
07/40 C1	120	Bos taurus	M3 low.	42.3	17.5
07/55 C1	256	Bos taurus	M3 low.	37.0	13.6
07/55 C1	259	Bos taurus	M3 low.	36.5	13.4
07/39 C3	513	Bos taurus	Scapula										*81.0	*69.0
07/40 C1	36	Bos taurus	Scapula										78
07/28 C1	180	Bos taurus	Humerus							*89.0		*86.0
07/40 C1	58	Bos taurus	Humerus									79.3
07/40 C1	40	Bos taurus	Tibia							67.5	51
09/69 C1	334	Bos taurus	Malleolus												34
07/39 C3	828	Bos taurus	Malleolus												39.4
07/110 C1	70	Bos taurus	Malleolus												30.6
09/69 C1	291	Bos taurus	Astragalus							*47.0						72.0
07/39 C3	480	Bos taurus	Metacarpal				69.4	45.5
07/40 C1	33	Bos taurus	Metacarpal							69.0
07/40 C1	39	Bos taurus	Metacarpal				66.6	42.5
07/40 C1	59	Bos taurus	Metacarpal							68.4
07/40 C1	72	Bos taurus	Metacarpal				68.3	40.5
07/110 C1	11	Bos taurus	Metacarpal							*63.0
07/110 C1	25	Bos taurus	Metacarpal					*40.0
07/110 C1	91	Bos taurus	Metacarpal							*61.0
09/69 C1	326	Bos taurus	Metatarsal							>56.0
07/110 C1	1	Bos taurus	Metatarsal							*59.0
00/301	67	Bos taurus	Phalanx 1			65.8
00/301	73	Bos taurus	Phalanx 1				28.4	34
07/39 C3	509	Bos taurus	Phalanx 1			73	34.0	37.3	28.5	30.3
07/40 C1	13	Bos taurus	Phalanx 1			*69.5
07/40 C1	60	Bos taurus	Phalanx 1			*70.0
07/40 C1	75	Bos taurus	Phalanx 1			*70.5
00/556 ext. stele	18	Bos taurus	Phalanx 1				35.4	35.5
07/110 C1	19	Bos taurus	Phalanx 1				31.6	36.1
00/301	63	Bos taurus	Phalanx 2			45	29	30.1	24.8	25
00/301	167	Bos taurus	Phalanx 2			43.6	25.5	26.4	22.6	19.5
07/39 C3	483	Bos taurus	Phalanx 2			44.0		32.3	25.0	24.3
07/40 C1	21	Bos taurus	Phalanx 2			*47.0
07/40 C1	22	Bos taurus	Phalanx 2			*44.0
07/40 C1	30	Bos taurus	Phalanx 2			*46.0
07/40 C1	62	Bos taurus	Phalanx 2			*47.7
07/110 C1	17	Bos taurus	Phalanx 2			45.5	31.6	33	26.3	26.1
07/40 C1	51	Bos taurus	Phalanx 3															115.0		74.6
07/110 C1	5	Bos taurus	Phalanx 3															*82.5
07/40 C1	112	Ovis vel Capra	M3 up.	17.2	11.1
07/40 C1	115	Ovis vel Capra	M3 up.	17.1	11.0
00/301	132	Ovis vel Capra	Tibia							24.4	19.3
00/301	356	Ovis vel Capra	Tibia							26.2	18
00/301	265	Ovis vel Capra	Malleolus												14.4
00/301	318	Ovis vel Capra	Astragalus														28.3
00/301	328	Ovis vel Capra	Astragalus														30.0
00/301	105	Ovis vel Capra	Phalanx 1				10.1	14
00/301	106	Ovis vel Capra	Phalanx 1				10.6	13.6
00/301	127	Ovis vel Capra	Phalanx 1						8.5	9.7
00/301	327	Ovis vel Capra	Phalanx 1				11.3	14.8
00/301	358	Ovis vel Capra	Phalanx 1			41.5	12.2	14.6	10	11.8
00/301	424	Ovis vel Capra	Phalanx 1			40.8	13.0	15.4	9.6	11.8
00/301	140	Ovis vel Capra	Phalanx 2			27	10.1	11.5	8.0
00/301	192	Ovis vel Capra	Phalanx 2				10.6	11.5
00/301	197	Ovis vel Capra	Phalanx 2			25.6	8.9	10.1		8.3
00/301	325	Ovis vel Capra	Phalanx 2			26.1	14.0		10.8	11.1
00/301	355	Ovis vel Capra	Phalanx 2			*25.7		12.4	9.8
00/301	359	Ovis vel Capra	Phalanx 2			25.0		11.6	8.3	8.4
00/301	425	Ovis vel Capra	Phalanx 2				11.5	12.7
00/301	428	Ovis vel Capra	Phalanx 2			25.5	11.5	13.9	9.4	9.8
00/301	430	Ovis vel Capra	Phalanx 2			25.4	11.6	12.1	8.7	9.1
07/39 C4 corbeille	26	Ovis vel Capra	Phalanx 2			*25.0	*14.3		*10.3	*10.2
07/39 C4 ext. stele	20	Ovis vel Capra	Phalanx 3															*23.0		>26	5.5
